# Supplementary material
Source: ML conference proceedings conference paper supplement (https://openreview.net/forum?id=pNDvPXd1qUk)

# Walker-v2

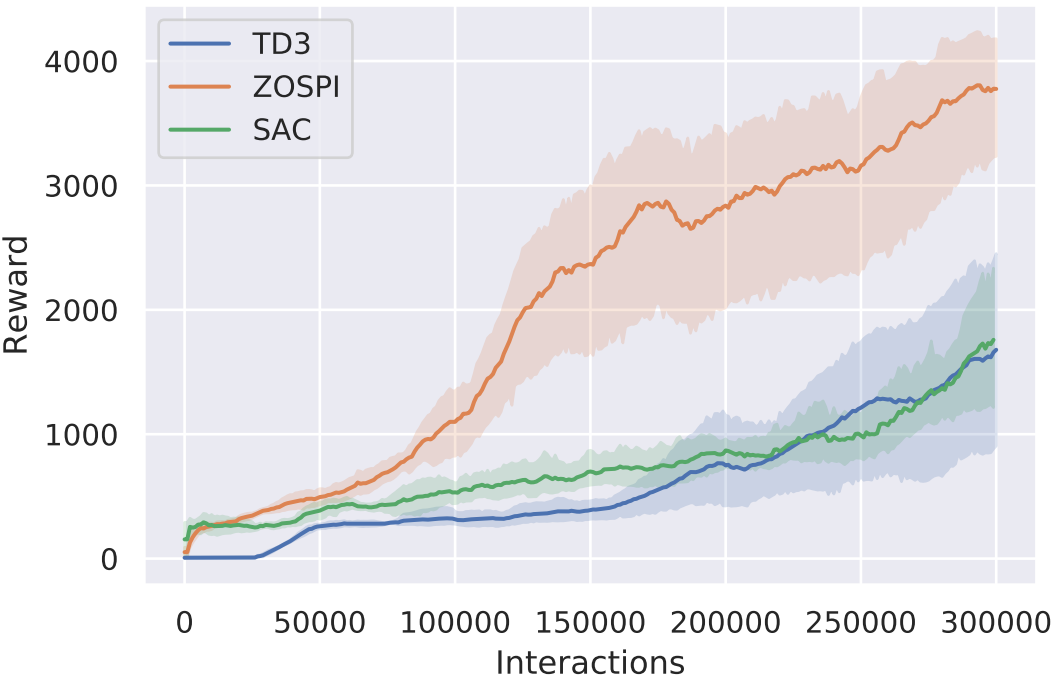

Supplement: supplementary_material [file attachment]

# Ant-v2

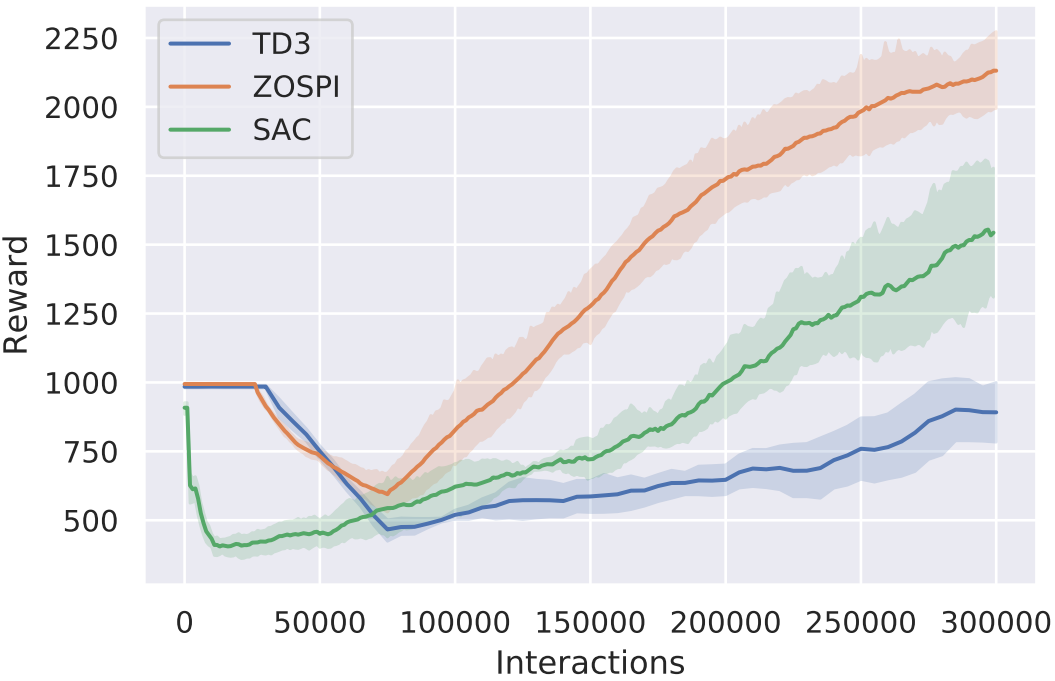

Supplement: supplementary_material [file attachment]

# Ablation study on Walker2d-v2

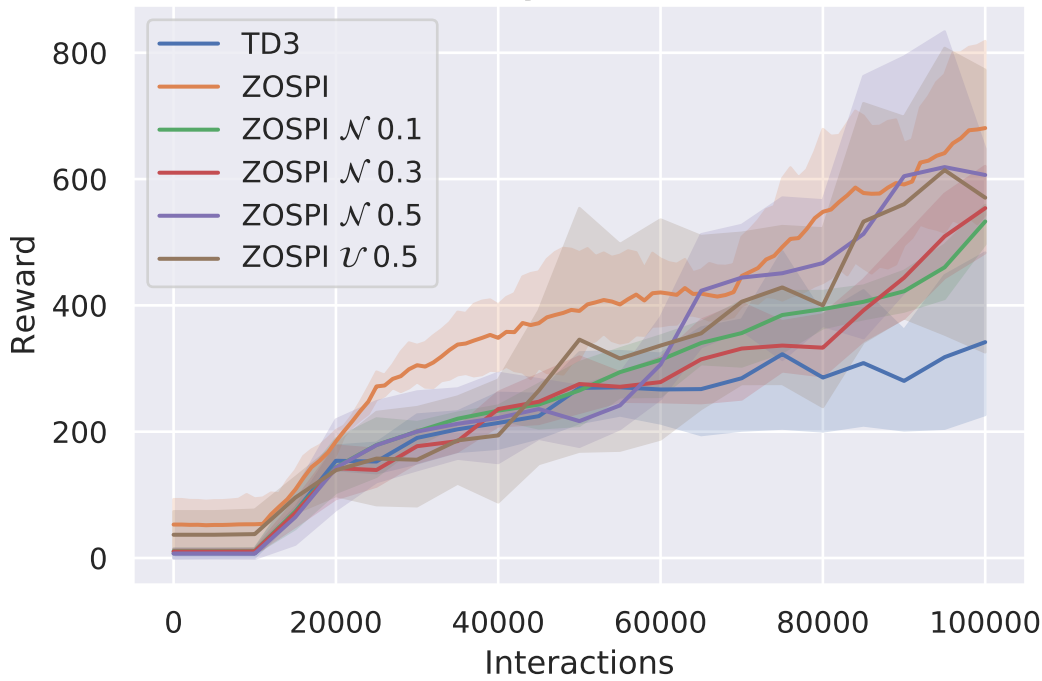

Supplement: supplementary_material [file attachment]

# Hopper-v2

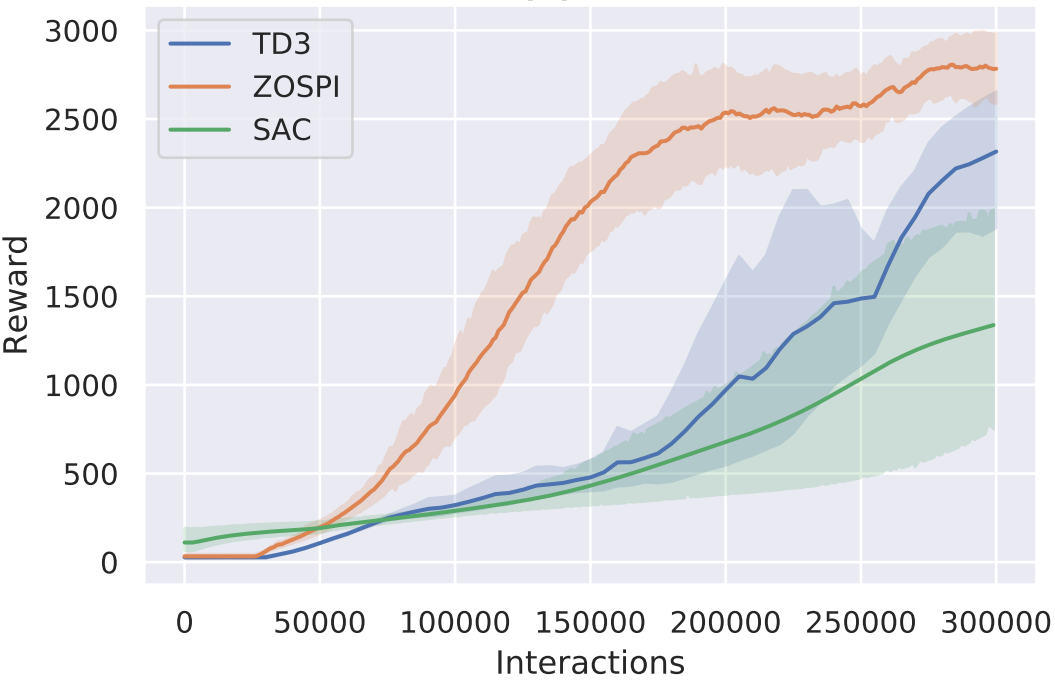

Supplement: supplementary_material [file attachment]

# HalfCheetah-v2

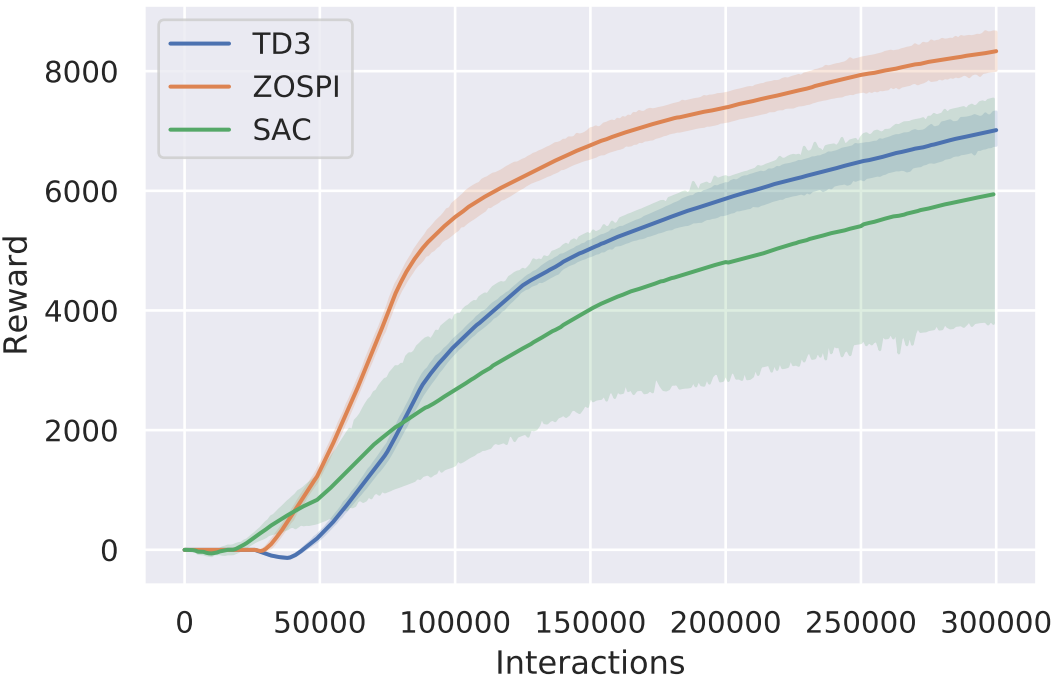

Supplement: supplementary_material [file attachment]

# Humanoid-v2

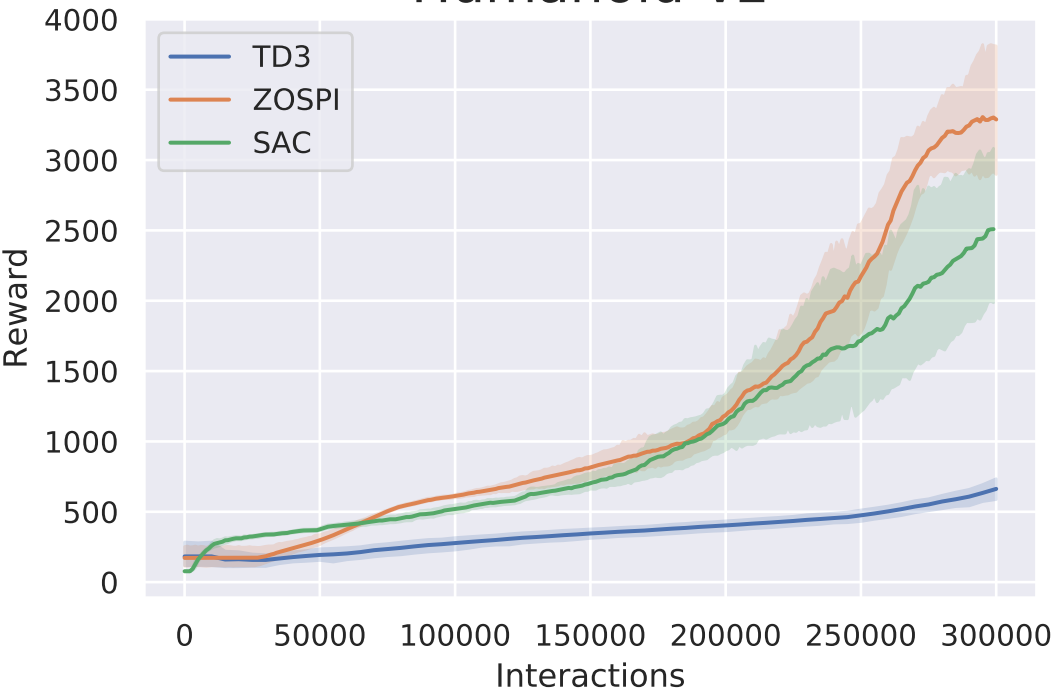

Supplement: supplementary_material [file attachment]
